# Supplementary material
Source: PubMed Central journal article supplement (PMC6535804)
Supplement: NIHMS1016444-supplement-Supplemental_Appendix.pdf [file NIHMS1016444-supplement-Supplemental_Appendix.pdf]

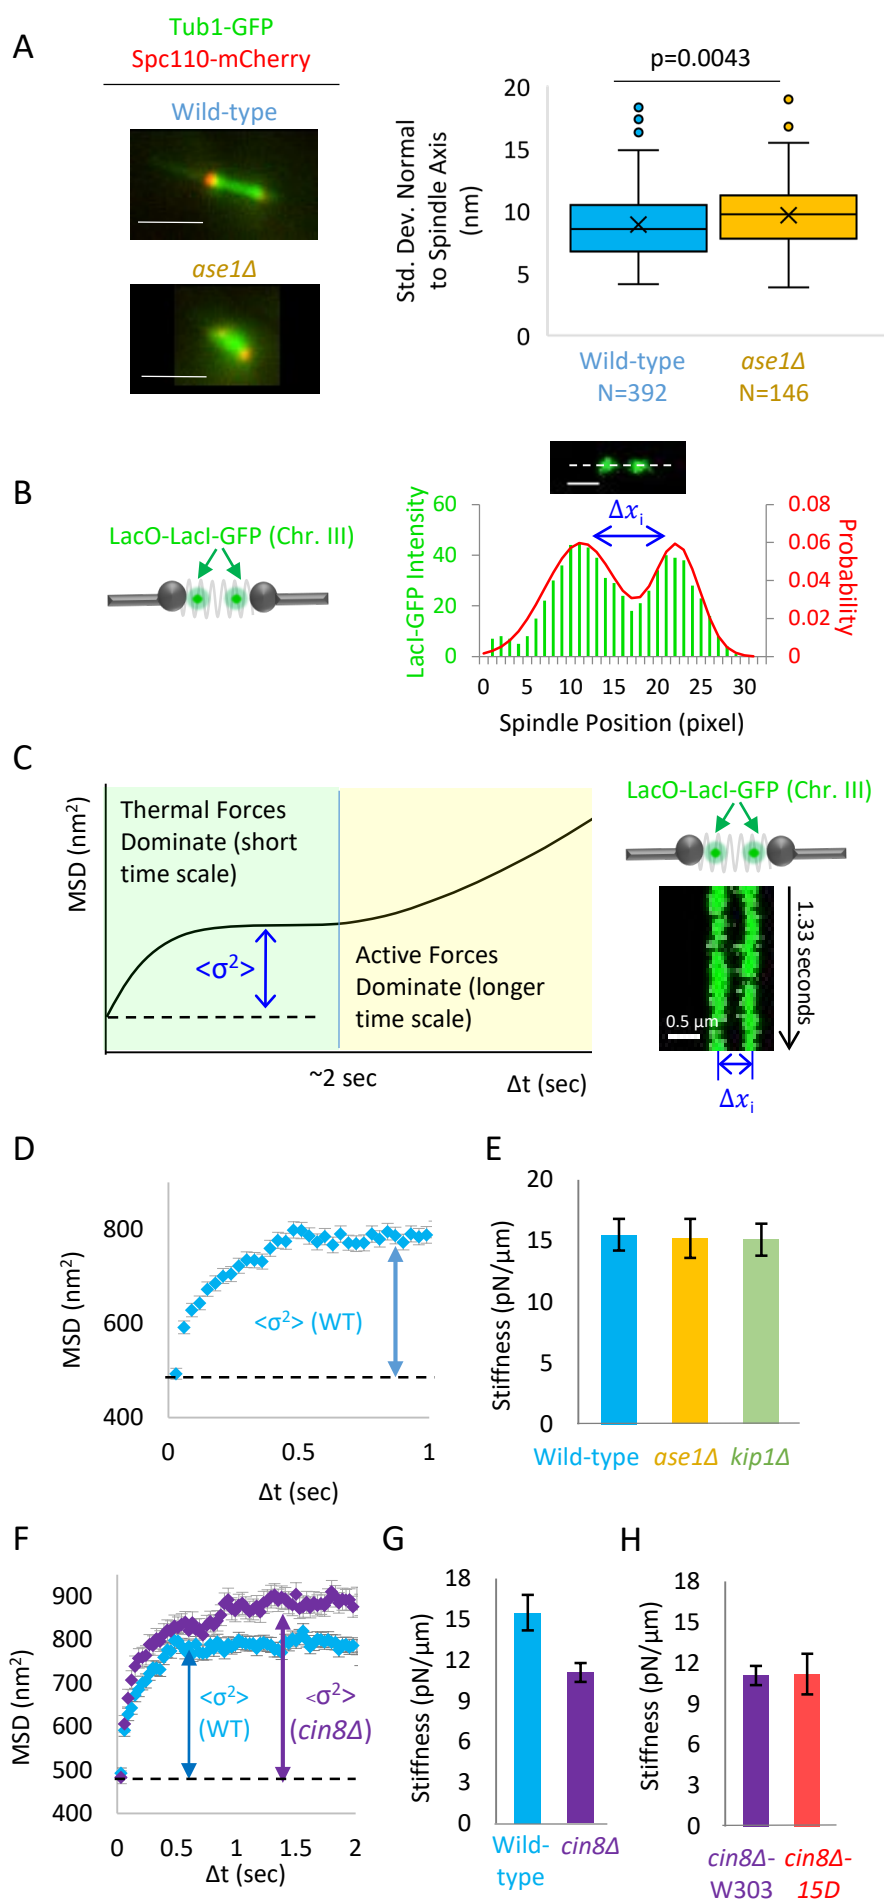

**Figure S1, Relates to Figure 1: Estimation of tension in the *S. cerevisiae* mitotic spindle at metaphase.**

(A) Left: Typical images of wild-type and *ase1Δ* cells (Green, Tub1-GFP, red, SPC110-mCherry; scale bar 1000 nm). Right: spindle width as estimated by fitting the standard deviation of a Gaussian distribution perpendicular to the spindle axis for Tub1-GFP fluorescence. *ase1Δ* spindles are wider than wild-type cell spindles ( $t = -2.87$ ,  $p=0.0043$ ). (B) Left: To estimate inter-kinetochore spring tension, a LacI-GFP fusion was localized to a tandem array of 33 lacO repeats inserted 1.1 kb 3' to CEN3. Right: Representation of fluorescence intensity of the lacO-lacI-GFP centromeric labels along the spindle axis as a histogram (green bars), and subsequent Gaussian fitting to accurately determine the center of each spot (red line)). To estimate tension, the distance between the two spots is determined, and designated as  $\Delta x_i$ . (C) Left: Mean squared displacement (MSD) is used to describe the variance in position between the two sister centromere lacO-lacI-GFP spots over time. At short time scales (left, green), this variability occurs as a result of thermal forces, and the MSD values reflect constrained diffusion. This is the time scale in which stiffness measurements are made. At longer time scales (right, yellow), active forces dominate, and so variability measurements were not collected in this regime. Right: Representative kymograph of lacO-lacI-GFP spots over time, using fast time-lapse imaging. Kymograph shows 40 frames imaged at 30 frames/sec. (D) Mean squared displacement (MSD) vs time step size curve for wild type *S. cerevisiae* cells (blue arrow shows calculated  $\langle \sigma^2 \rangle$  value). (E) Comparison of spring constants for wild-type, *kip1Δ*, *ase1Δ* cells. (F) MSD vs time-step size curves comparing wild type (blue) with the *cin8Δ* mutant (purple). (blue and purple arrows show calculated  $\langle \sigma^2 \rangle$  values). (G) Quantification of the spring constant in *cin8Δ* mutant as compared to wild-type cells. (H) Comparison of spring constants in *cin8Δ* mutants from two different strain backgrounds. All panels: error bars=SEM.

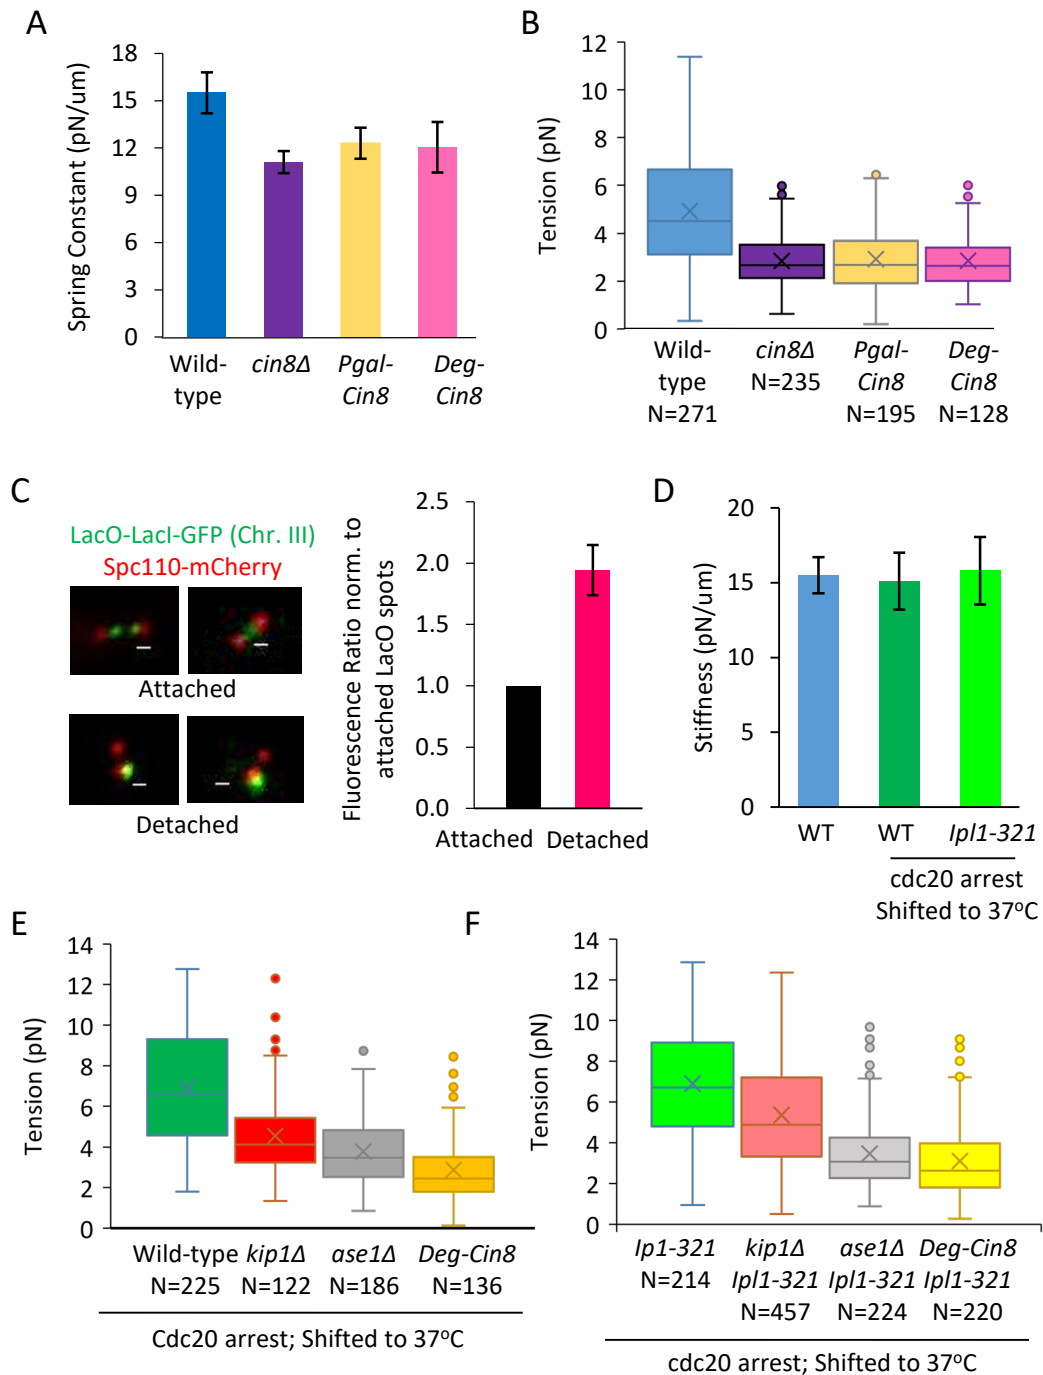

**Figure S2, Relates to Figure 2: Additional tension and detachment data.** (A) Comparison of spring constants in Cin8 conditional mutants as compared to wild-type and *cin8Δ* cells. Pgal-*cin8* cells were grown and imaged in glucose to repress Cin8 expression for comparison to Deg-Cin8. Deg-Cin8 cells were imaged with induction of Cin8 degradation. (B) Comparison of average tension magnitudes in wild-type, *cin8Δ* and Cin8 conditional knockout cells ( $F_{2,554} = 0.25$ ,  $p = 0.77$ , *cin8Δ* vs Pgal-Cin8 vs deg-Cin8). (C) Measurement of lacO-lacI-GFP intensity in cells with separated lacO-lacI-GFP spots (kinetochores attached), and cells with a single diffraction-limited spots (one detached kinetochore) (scale bars 500 nm). (D) Comparison of spring constant between wild type asynchronous cells at metaphase, and cells arrested with Cdc20 depletion and shifted to 37 °C. (E) Quantification of tension in cells that were arrested with Cdc20 depletion and shifted to 37 °C ( $F_{3,665} = 124.05$ ,  $p < .0001$ ). (F) Quantification of tension in cells harboring the *ipl-321* allele, arrested with Cdc20 depletion and shifted to 37 °C ( $F_{3,1151} = 139.43$ ,  $p < .0001$ ).

A

*kip1Δ* LacO-LacI-GFP (Chr. III) Spc110-mCherry

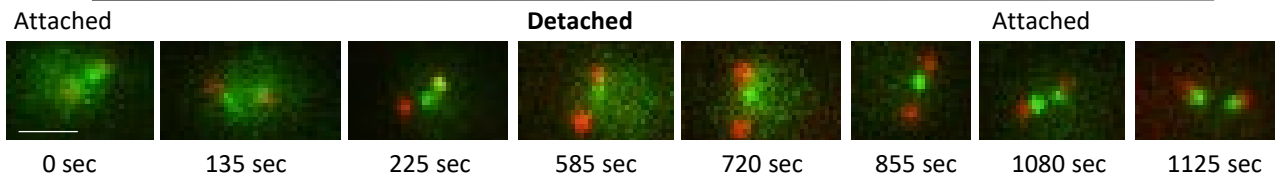

*ase1Δ* LacO-LacI-GFP (Chr. III) Spc110-mCherry

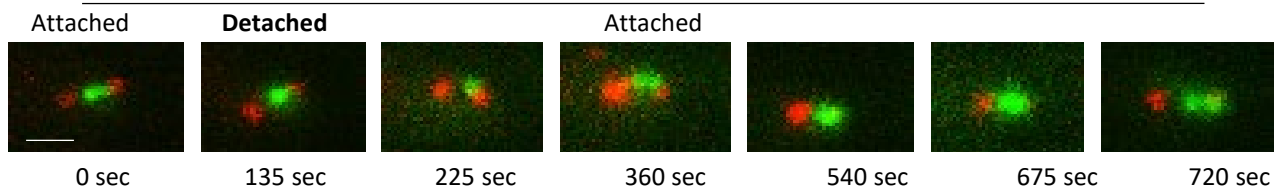

B

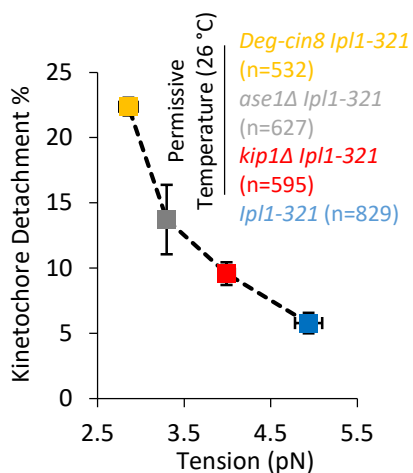

C

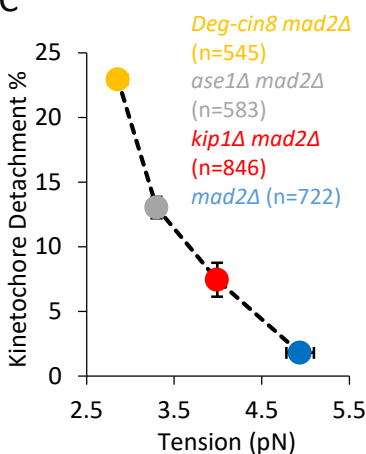

D

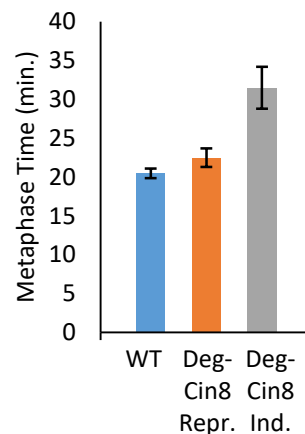

E

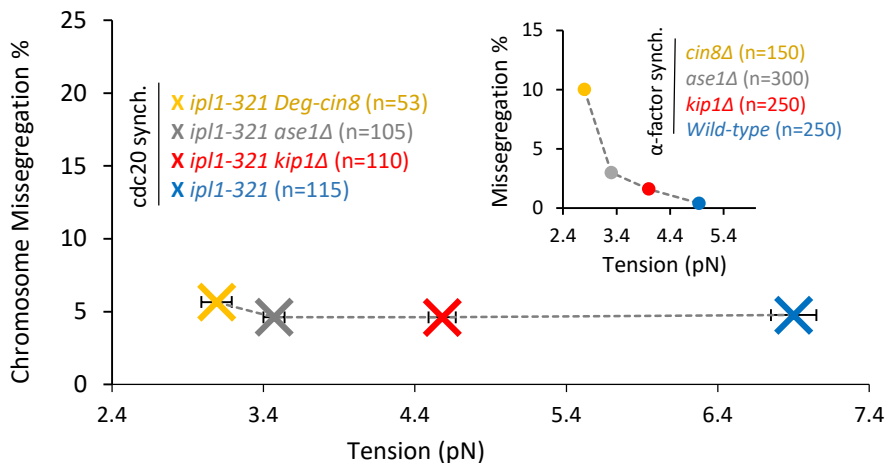

**Figure S3, Relates to Figure 2: Additional detachment and mis-segregation data.** (A) Images from time series in metaphase *kip1Δ* mutants (top) and *ase1Δ* mutants (bottom) demonstrating dynamic kinetochore attachments. (B) Dependence of detachments on magnitude of tension in cells harboring the *ipl-321* allele, at permissive temperature (26 °C) ( $z = -8.14$ ,  $p < 0.0001$ , Cochran-Armitage trend test). (C) Dependence of detachments on magnitude of tension in *mad2Δ* mutant background cell lines ( $z = -11.29$ ,  $p < 0.0001$ , Cochran-Armitage trend test). (D) Comparison of metaphase time in the Degron-cin8 mutant under conditions of degron repression (orange) and degron induction (gray). (E) To test the prediction that the observed tension dependent chromosome mis-segregation gradient would be abrogated in the absence of Aurora B activity, we first arrested wild type and tension mutant cells that harbored the temperature-sensitive Aurora B allele *ipl1-321* in metaphase using Cdc20 under a repressible promoter. This was performed at the permissive temperature for *ipl1-321*, since inactivation of *ipl1-321* prior to metaphase could induce premature attachment errors which might confound our analysis. We then shifted the cells to the restrictive temperature for the *ipl1-321* allele while cells were still in metaphase. Finally, we released cells from the cdc20 arrest, allowing them to complete metaphase and enter anaphase while at the restrictive temperature for *ipl1-321* allele, and assayed for chromosome mis-segregation as previously described. We observed an abrogation in the tension dependent chromosome mis-segregation gradient, consistent with our kinetochore detachment results (Fig. 2E). Inset: For reference the mis-segregation results in the absence of the *ipl1-321* allele are shown, with data reproduced from Fig. 2D. All panels: error bars=SEM.

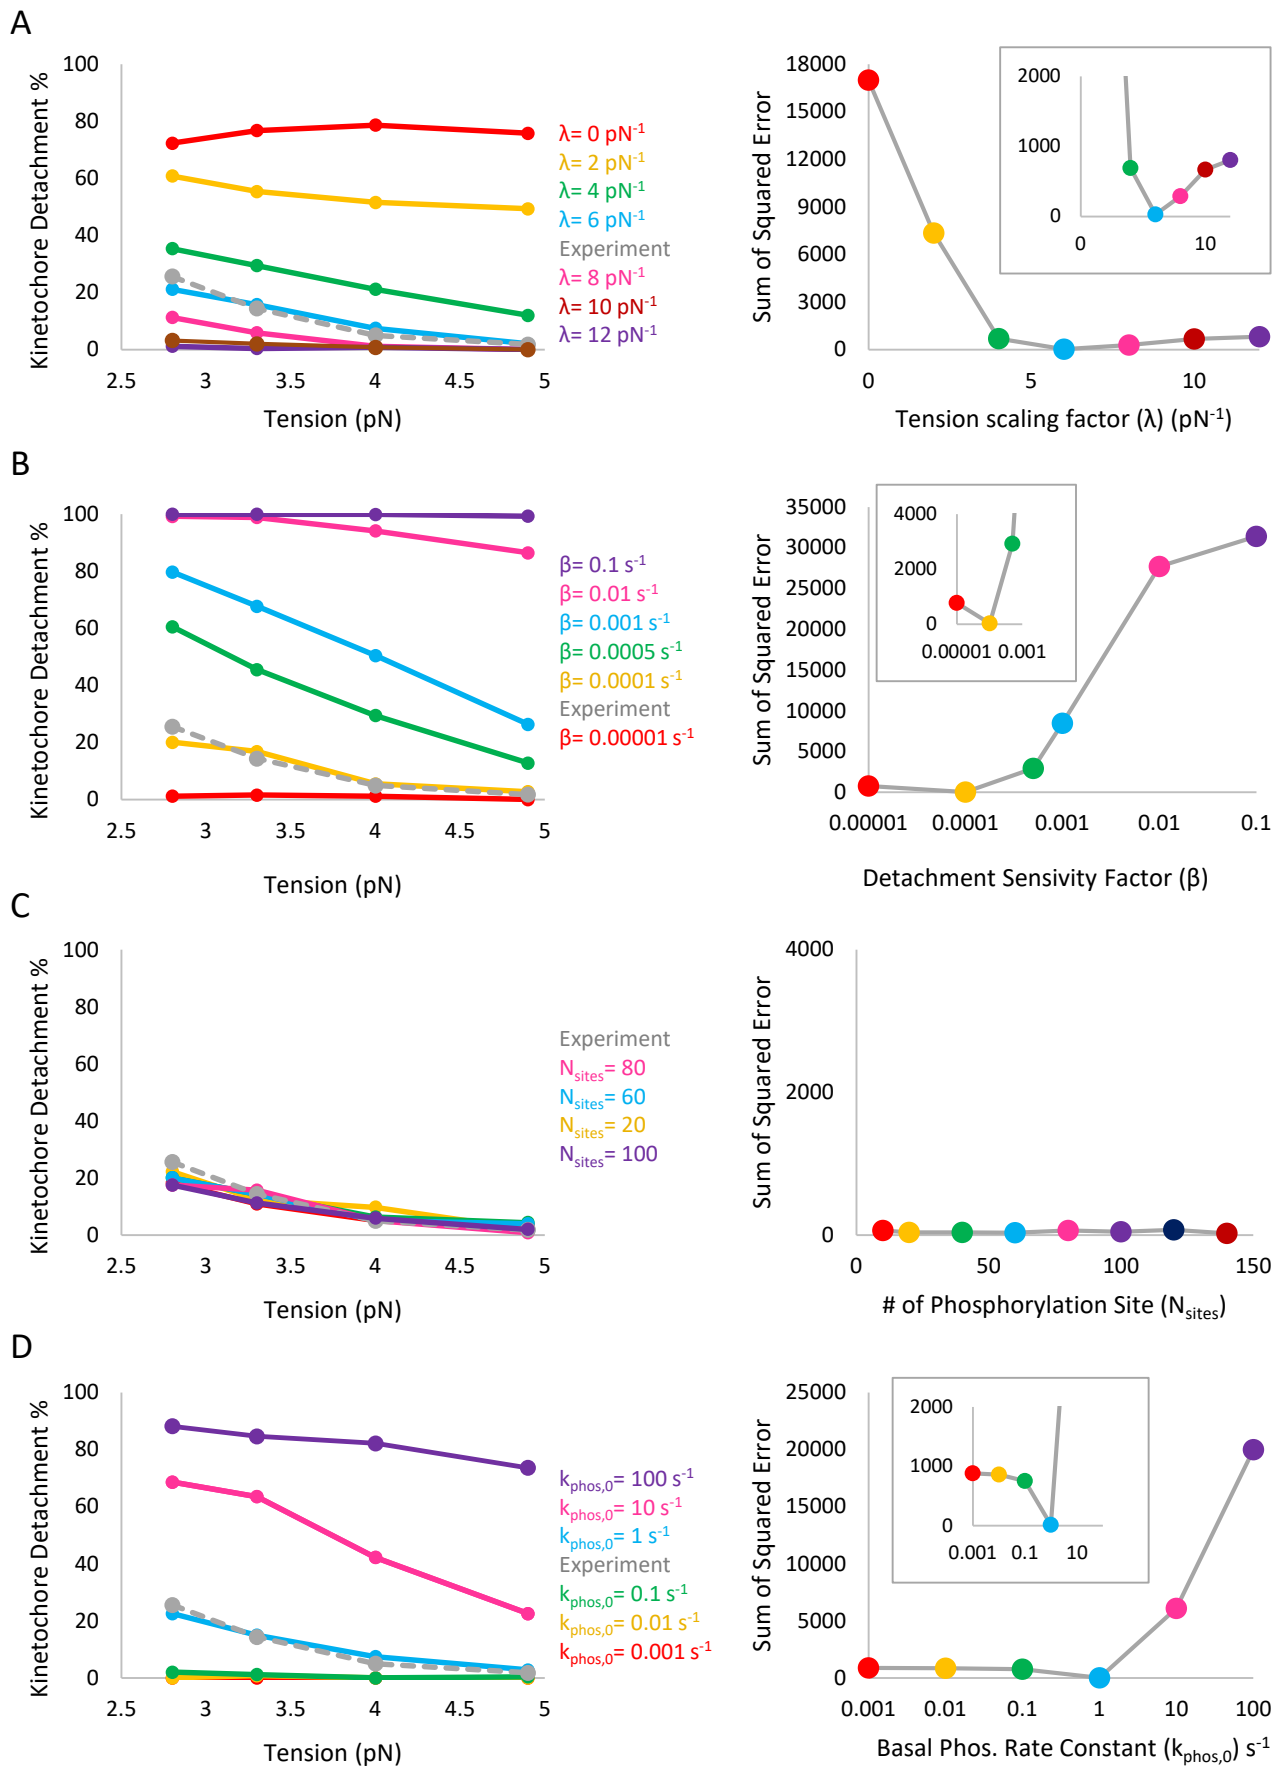

**Figure S4, Relates to Figure 4: Simulation parameter sensitivity analysis.** (A) Sensitivity of simulation results to the tension scaling factor ( $\lambda$ ). Left: Kinetochore detachment % vs tension for each parameter, experimental data shown in dotted grey line. Right: SSE (sum of squared errors) represents the summed error between simulation and experiment for kinetochore detachment % (see simulation methods). A smaller number indicates better fit. Inset shows rescaled y-axis for clarity. (B) Sensitivity of simulation results to the detachment scaling factor ( $\beta$ ). Simulation results are sensitive to  $\beta$  for  $\beta > 0.001$ . Left: Kinetochore detachment % vs tension for each parameter, experimental data shown in dotted grey line. Right: SSE (sum of squared errors) represents the summed error between simulation and experiment for kinetochore detachment % (note that x-axis is log to demonstrate results over 5 orders of magnitudes) (see simulation methods). A smaller number indicates better fit. Inset shows rescaled y-axis for clarity. (C) Sensitivity of simulation results to the total number of kinetochore phosphorylation sites ( $N_{\text{sites}}$ ). Simulation results are insensitive to the parameter  $N_{\text{sites}}$ , likely because results are sensitive to the *fraction* of phosphorylated sites, and thus are insensitive to the absolute number of sites ( $N_{\text{sites}}$ ) within a single kinetochore. Left: Kinetochore detachment % vs tension for each parameter, experimental data shown in dotted grey line. Right: SSE (sum of squared errors) represents the summed error between simulation and experiment for kinetochore detachment % (see simulation methods). A smaller number indicates better fit. (D) Sensitivity of simulation results to the basal (no tension) phosphorylation rate constant ( $k_{\text{phos},0}$ ). Simulation results are sensitive to  $k_{\text{phos},0}$ , especially for values of  $k_{\text{phos},0} > 1 \text{ s}^{-1}$ . Left: Kinetochore detachment % vs tension for each parameter, experimental data shown in dotted grey line. Right: SSE (sum of squared errors) represents the summed error between simulation and experiment for kinetochore detachment % (see simulation methods). A smaller number indicates better fit. Inset shows rescaled y-axis for clarity.



**A** Combined MALDI spectrum

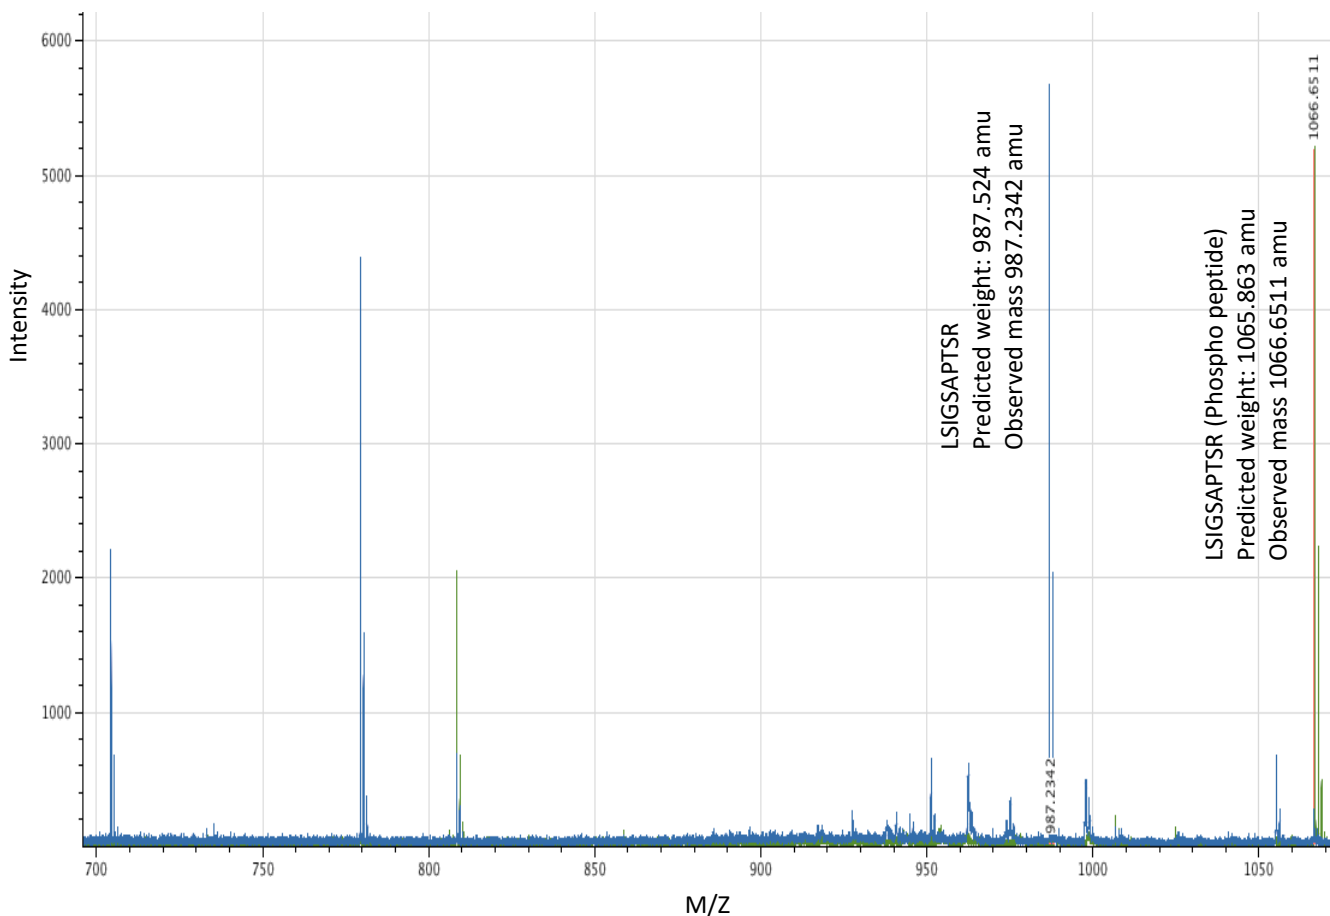

**B** MS/MS Sequence

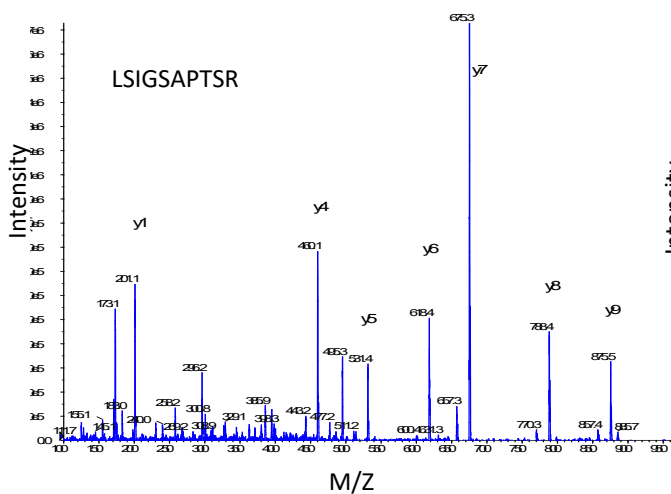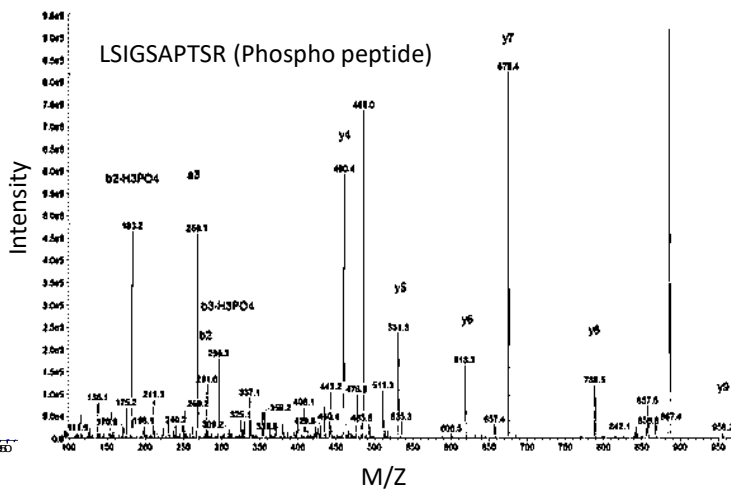

**Figure S5, Relates to Figure 5: Mass Spectroscopy Data.** (A) Combined Matrix Assisted Laser Desorption/Ionization (MALDI) spectra of crude synthetic peptide demonstrating mass to charge ratio ( $m/z$ ) of 987.2342 (expected  $[M+H]^+ = 987.114$ ) for the dephosphorylated Dam1 peptide L<sub>S</sub>IGSAPT<sub>S</sub>R and  $m/z$  of 1066.6511 (expected  $[M+H]^+ = 1067.034$ ) for the phosphorylated Dam1 peptide L(Phospho-S)IGSAPT<sub>S</sub>R. Measurements were taken on a Bruker Autoflex MALDI mass spectrometer (Bremen, Germany) (B) Upon HPLC purification both peptides were verified using liquid chromatography-tandem mass spectrometry (LC MS/MS) with prominent peaks representative of the expected Y4, Y5, Y6, Y7, Y8, and Y9 species detected in both the dephosphorylated and phosphorylated L<sub>S</sub>IGSAPT<sub>S</sub>R peptides. Measurements were taken on a SCIEX 5500 Qtrap Triple Quadrupole Mass Spectrometer (Framingham, MA).
